# Supplementary material
Source: PubMed Central journal article supplement (PMC6396846)
Supplement: jamaotolaryngolheadnecksurg-145-132-s001.pdf [file jamaotolaryngolheadnecksurg-145-132-s001.pdf]

## Supplementary Online Content

Golub JS, Brewster KK, Brickman AM, et al. Association of audiometric age-related hearing loss with depressive symptoms among Hispanic individuals. *JAMA Otolaryngol Head Neck Surg*. Published online December 6, 2018. doi:10.1001/jamaoto.2018.3270

**eTable 1.** Logistic Regression Models for Antidepressant Use Based on Hearing Loss. Hispanic Community Health Study (HCHS), age  $\geq 50$  years, n = 5,328

**eTable 2.** Logistic Regression Models for Clinically Significant Depressive Symptoms (CESD-10 Score  $\geq 16$ ) Based on Hearing Loss. Hispanic Community Health Study (HCHS), age  $\geq 50$  years, n = 5,328.

**eTable 3.** Log-Linear Regression Models for Clinically Significant Depressive Symptoms (CESD-10 Score  $\geq 10$ ) Based on Hearing Loss. Hispanic Community Health Study (HCHS), age  $\geq 50$  years, n = 5,328.

This supplementary material has been provided by the authors to give readers additional information about their work.

**eTable 1. Logistic Regression Models for Antidepressant Use Based on Hearing Loss. Hispanic Community Health Study (HCHS), age ≥ 50 years, n=5,328.**

| <b>Model (Predictors)</b>                           | <b>Odds Ratio per 20 dB of Hearing Loss (95% CI)<sup>e</sup></b> |
|-----------------------------------------------------|------------------------------------------------------------------|
| 1. Hearing loss <sup>a</sup>                        | 1.25 (1.06-1.45)                                                 |
| 2. Above + hearing aid <sup>b</sup>                 | 1.21 (1.03-1.42)                                                 |
| 3. Above + demographics <sup>c</sup>                | 1.23 (1.03-1.46)                                                 |
| 4. Above + cardiovascular risk factors <sup>d</sup> | 1.21 (1.01-1.44)                                                 |

<sup>a</sup>Hearing loss, based on magnitude of pure tone average in better hearing ear

<sup>b</sup>Hearing aid is yes/no (used in past year)

<sup>c</sup>Demographics include age, gender, education, study site, geographic background

<sup>d</sup>Cardiovascular risk factors include coronary artery disease (test-defined), hypertension (measured), stroke/transient ischemic attack (self-reported), diabetes (lab-defined)

<sup>e</sup>A 20 dB increase in hearing loss is approximately equivalent to a 1-category worsening (categories are: normal, mild, moderate, moderately-severe, severe, profound)

**eTable 2. Logistic Regression Models for Clinically Significant Depressive Symptoms (CESD-10 Score  $\geq$  16) Based on Hearing Loss. Hispanic Community Health Study (HCHS), age  $\geq$  50 years, n=5,328.**

| <b>Model (Predictors)</b>                                     | <b>Prevalence Ratio per 20 dB of Hearing Loss (95% CI)<sup>e</sup></b> |
|---------------------------------------------------------------|------------------------------------------------------------------------|
| 1. Hearing loss <sup>a</sup>                                  | 1.20 (1.04-1.38)                                                       |
| 2. Above + hearing aid <sup>b</sup>                           | 1.24 (1.07-1.43)                                                       |
| 3. Above + demographics <sup>c</sup>                          | 1.52 (1.29-1.78)                                                       |
| 4. Above + cardiovascular risk factors <sup>d</sup>           | 1.52 (1.29-1.78)                                                       |
| 5. Above + antidepressant use ( <b>fully adjusted model</b> ) | 1.49 (1.27-1.75)                                                       |

<sup>a</sup>Hearing loss, based on magnitude of pure tone average in better hearing ear

<sup>b</sup>Hearing aid is yes/no (used in past year)

<sup>c</sup>Demographics include age, gender, education, study site, geographic background

<sup>d</sup>Cardiovascular risk factors include coronary artery disease (test-defined), hypertension (measured), stroke/transient ischemic attack (self-reported), diabetes (lab-defined)

<sup>e</sup>A 20 dB increase in hearing loss is approximately equivalent to a 1-category worsening (categories are: normal, mild, moderate, moderately-severe, severe, profound)

**eTable 3. Log-Linear Regression Models for Clinically Significant Depressive Symptoms (CESD-10 Score  $\geq$  10) Based on Hearing Loss. Hispanic Community Health Study (HCHS), age  $\geq$  50 years, n=5,328.**

| <b>Model (Predictors)</b>                                     | <b>Prevalence Ratio per 20 dB of Hearing Loss (95% CI)<sup>e</sup></b> |
|---------------------------------------------------------------|------------------------------------------------------------------------|
| 1. Hearing loss <sup>a</sup>                                  | 1.17 (1.07-1.26)                                                       |
| 2. Above + hearing aid <sup>b</sup>                           | 1.18 (1.08-1.28)                                                       |
| 3. Above + demographics <sup>c</sup>                          | 1.25 (1.14-1.36)                                                       |
| 4. Above + cardiovascular risk factors <sup>d</sup>           | 1.24 (1.14-1.36)                                                       |
| 5. Above + antidepressant use ( <b>fully adjusted model</b> ) | 1.23 (1.12-1.34)                                                       |

<sup>a</sup>Hearing loss, based on magnitude of pure tone average in better hearing ear

<sup>b</sup>Hearing aid is yes/no (used in past year)

<sup>c</sup>Demographics include age, gender, education, study site, geographic background

<sup>d</sup>Cardiovascular risk factors include coronary artery disease (test-defined), hypertension (measured), stroke/transient ischemic attack (self-reported), diabetes (lab-defined)

<sup>e</sup>A 20 dB increase in hearing loss is approximately equivalent to a 1-category worsening (categories are: normal, mild, moderate, moderately-severe, severe, profound)
